# Supplementary material for: Wnt/β-catenin signaling regulates adipose tissue lipogenesis and adipocyte-specific loss is rigorously defended by neighboring stromal-vascular cells
Source: PubMed Central journal article supplement (PMC7554252; doi:10.1016/j.molmet.2020.101078), 2020-09-09

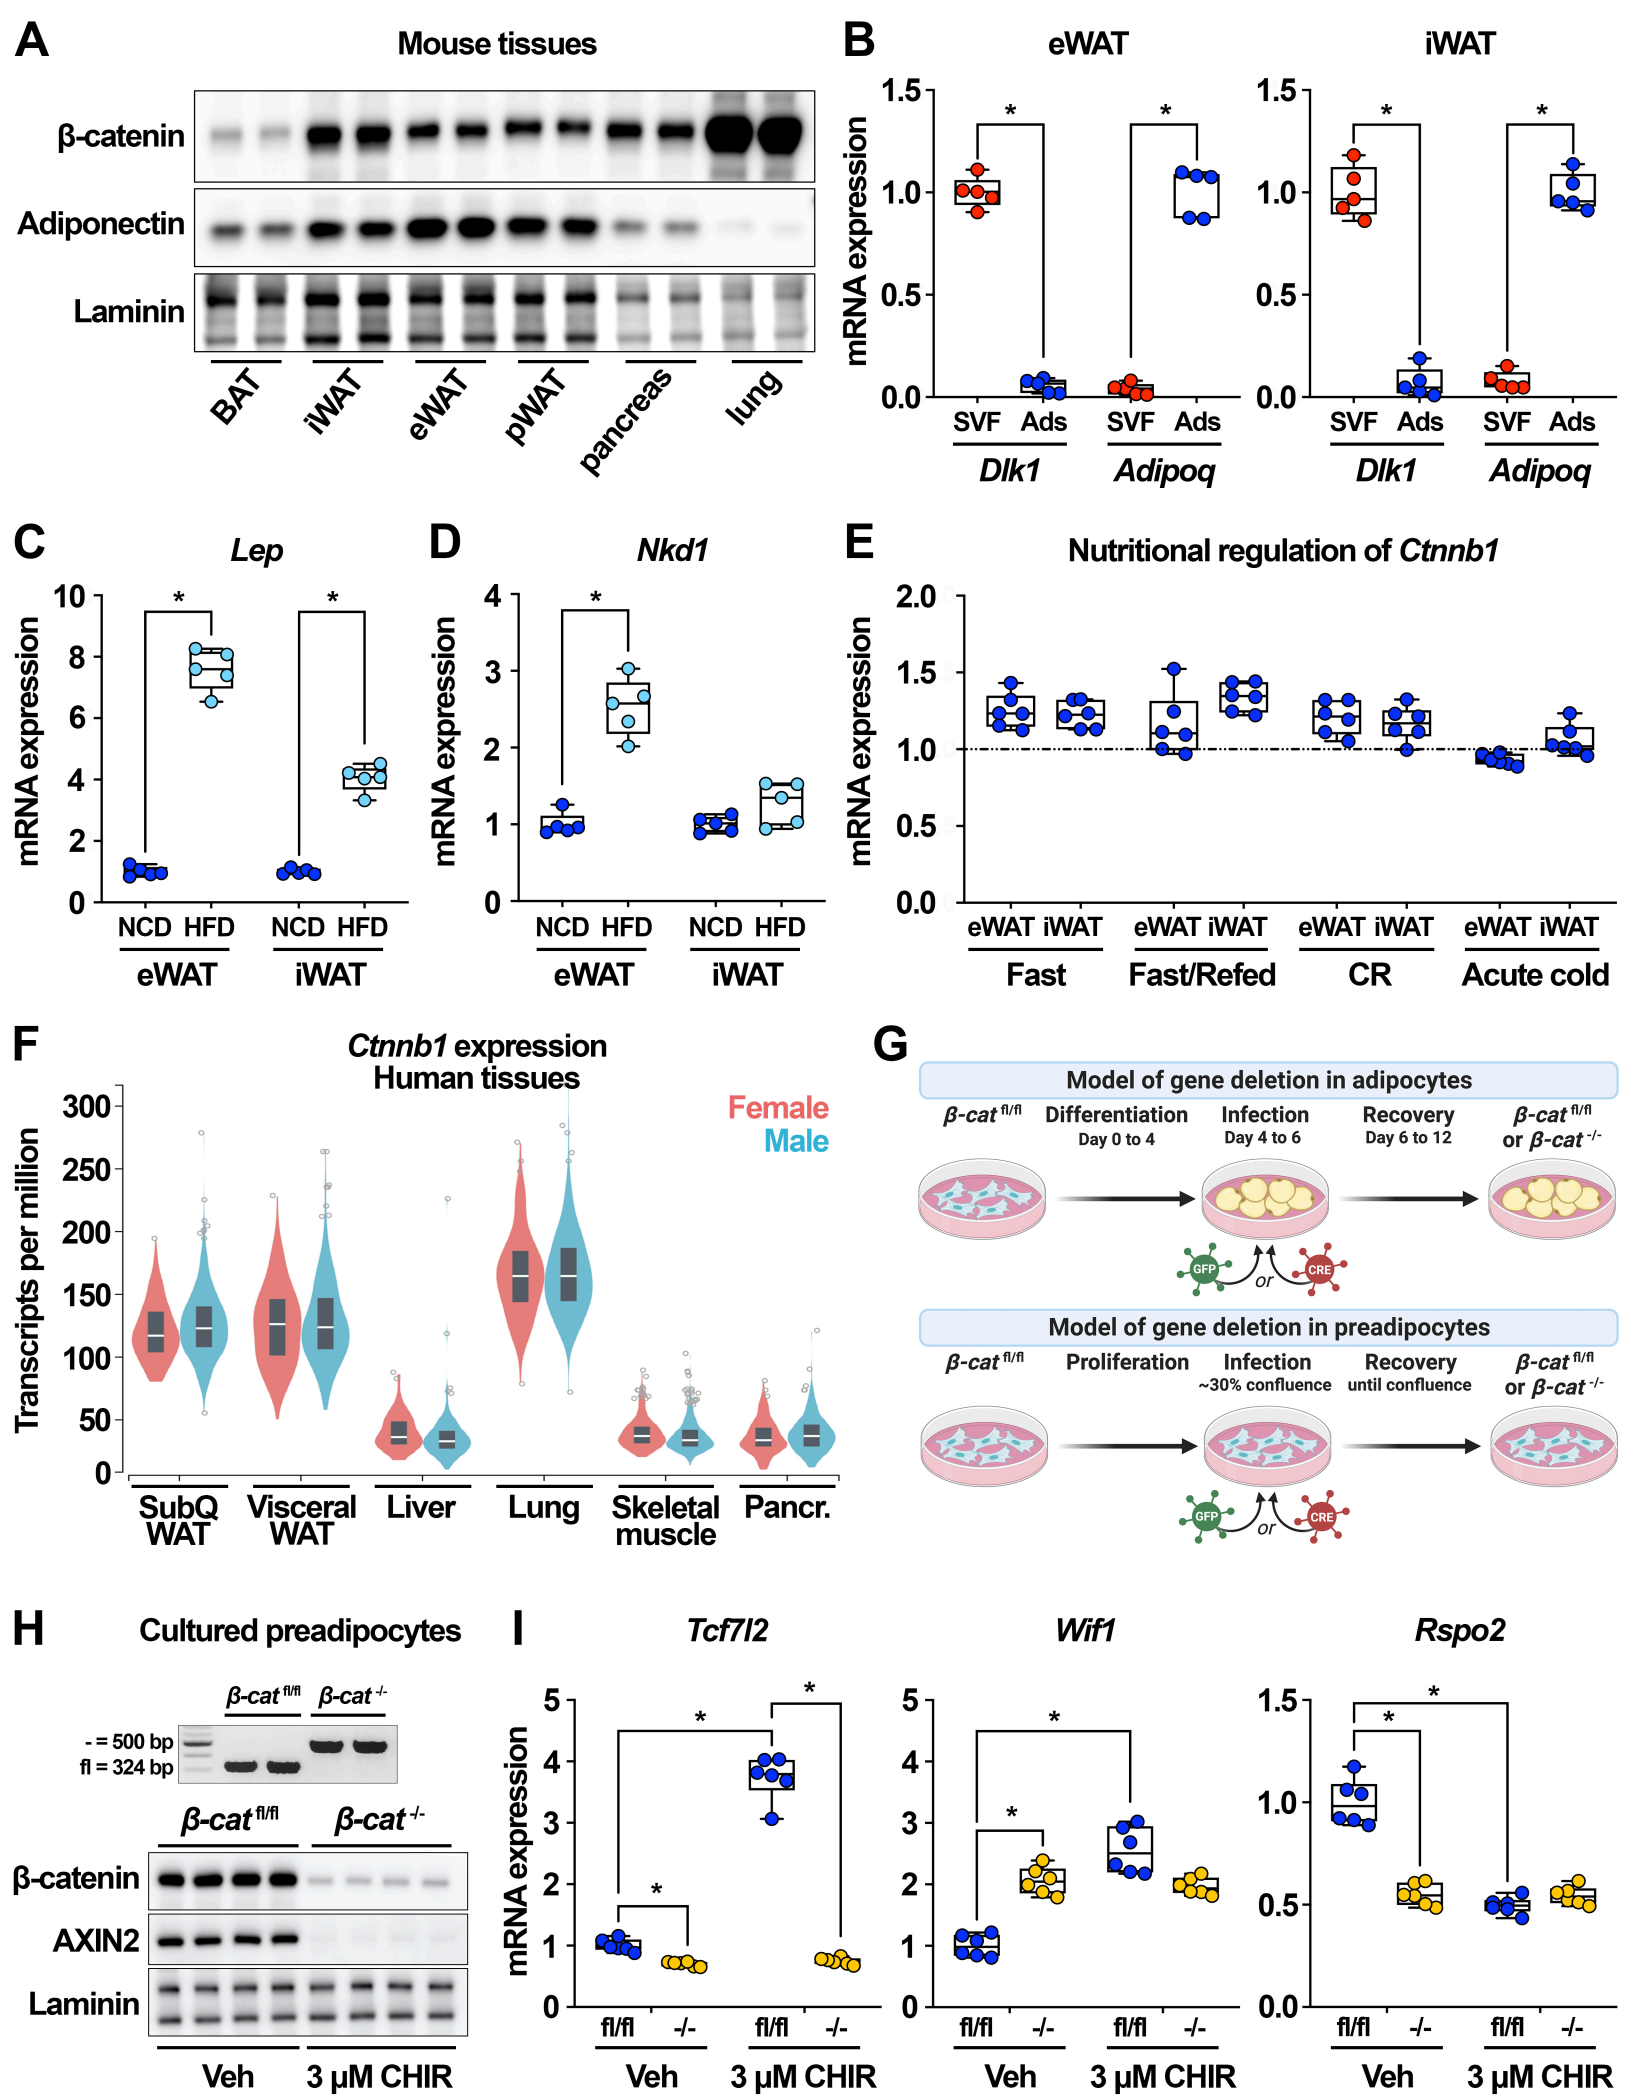

Supplement: mmc1.pdf [file mmc1.pdf]
